1 **Sex chromosome and sex locus characterization in the goldfish,**

2 ***Carassius auratus*.**

3  
4 Ming Wen<sup>1,2</sup>, Romain Feron<sup>2,3,4</sup>, Qiaowei Pan<sup>2,3</sup>, Justine Guguin<sup>2</sup>, Elodie Jouanno<sup>2</sup>, Amaury  
5 Herpin<sup>2</sup>, Christophe Klopp<sup>5,6</sup>, Cedric Cabau<sup>6</sup>, Margot Zahm<sup>6</sup>, Hugues Parrinello<sup>7</sup>, Laurent  
6 Journot<sup>7</sup>, Shawn M. Burgess<sup>8</sup>, Yoshihiro Omori<sup>9,10</sup>, John H. Postlethwait<sup>11</sup>, Manfred Schartl<sup>12</sup>,  
7 Yann Guiguen<sup>2\*</sup>

8

9 \* Correspondance: Yann Guiguen: [yann.guiguen@inra.fr](mailto:yann.guiguen@inra.fr)

10

11 **AFFILIATIONS:**

12

13 <sup>1</sup> State Key Laboratory of Developmental Biology of Freshwater Fish, College of Life Science,  
14 Hunan Normal University, Changsha, China

15 <sup>2</sup> INRAE, UR 1037 Fish Physiology and Genomics, F-35000 Rennes, France.

16 <sup>3</sup> Department of Ecology and Evolution, University of Lausanne, 1015 Lausanne, Switzerland.

17 <sup>4</sup> Swiss Institute of Bioinformatics, 1015 Lausanne, Switzerland.

18 <sup>5</sup> Plate-forme bio-informatique Genotoul, Mathématiques et Informatique Appliquées de  
19 Toulouse, INRAE, Castanet Tolosan, France.

20 <sup>6</sup> SIGENAE, GenPhySE, Université de Toulouse, INRAE, ENVT, Castanet Tolosan, France.

21 <sup>7</sup> Montpellier GenomiX (MGX), c/o Institut de Génomique Fonctionnelle, 141 rue de la  
22 Cardonille, 34094, Montpellier Cedex 05, France.

23 <sup>8</sup> Translational and Functional Genomics Branch, National Human Genome Research Institute,  
24 Bethesda, MD, USA.

25 <sup>9</sup> Laboratory of Functional Genomics, Graduate School of Bioscience, Nagahama Institute of  
26 Bioscience and Technology, Nagahama, Shiga, Japan.

27 <sup>10</sup> Laboratory for Molecular and Developmental Biology, Institute for Protein Research, Osaka  
28 University, Suita, Osaka, Japan.

29 <sup>11</sup> Institute of Neuroscience, University of Oregon, Eugene, Oregon, USA.

30 <sup>12</sup> Developmental Biochemistry, Biozentrum, University of Würzburg, Würzburg, Germany and  
31 The Xiphophorus Genetic Stock Center, Department of Chemistry and Biochemistry, Texas  
32 State University, San Marcos, Texas, USA.

33

34

35

36

37

---

38 **Abstract**

39 **Background:** Goldfish is an important model for various areas of research, including neural  
40 development and behavior and a species of significant importance in aquaculture, especially as  
41 an ornamental species. It has a male heterogametic (XX/XY) sex determination system that  
42 relies on both genetic and environmental factors, with high temperatures being able to produce  
43 female-to-male sex reversal. Little, however, is currently known on the molecular basis of  
44 genetic sex determination in this important cyprinid model. We used sequencing approaches to  
45 better characterize sex determination and sex-chromosomes in goldfish.

46 **Results:** Our results confirmed that sex determination in goldfish is a mix of environmental  
47 and genetic factors and that its sex determination system is male heterogametic (XX/XY).  
48 Using reduced representation (RAD-seq) and whole genome (pool-seq) approaches, we  
49 characterized sex-linked polymorphisms and developed male specific genetic markers. These  
50 male specific markers were used to distinguish sex-reversed XX neomales from XY males and  
51 to demonstrate that XX female-to-male sex reversal could even occur at a relatively low rearing  
52 temperature (18°C), for which sex reversal has been previously shown to be close to zero. We  
53 also characterized a relatively large non-recombining region (~11.7 Mb) on goldfish linkage  
54 group 22 (LG22) that contained a high-density of male-biased genetic polymorphisms. This  
55 large LG22 region harbors 373 genes, including a single candidate as a potential master sex  
56 gene, i.e., the anti-Mullerian hormone gene (*amh*). However, no sex-linked polymorphisms  
57 were detected in the goldfish *amh* gene or its 5 kb proximal promoter sequence.

58 **Conclusions:** These results show that goldfish have a relatively large sex locus on LG22, which  
59 is likely the goldfish Y chromosome. The presence of a few XX males even at low temperature  
60 also suggests that other environmental factors in addition to temperature could trigger female-  
61 to-male sex reversal. Finally, we also developed sex-linked genetic markers in goldfish, which  
62 will be important for future research on sex determination and aquaculture applications in this  
63 species.

64 **Key words:** Goldfish, RADseq, Poolseq, Sex determination, Sex markers, Male genome  
65 assembly

66

---

67 **BACKGROUND**

68 Goldfish, *Carassius auratus*, is a domesticated fish species originating from central Asia and  
69 China that has been introduced throughout the world. Goldfish belongs to the Cyprinidae family  
70 and is considered as an important fish model for research in endocrinology [1, 2],  
71 developmental biology [3, 4] or fish pathology [5]. Thanks to the recent availability of a whole  
72 genome sequence assembly [6], goldfish is also now becoming a key model species for studies  
73 on genomics and cyprinid genome evolution. It is also a species of high aquaculture importance  
74 especially as an ornamental species, with many beautiful and sometimes bizarre phenotypes [7].  
75 Unlike birds and mammals, sex determination in teleost is highly dynamic, with frequent  
76 turnovers of both sex determination (SD) systems [8] and master sex determining genes (MSD)  
77 [9, 10]. Currently about half a dozen different master sex determining genes have been  
78 identified in teleosts, including *dmrt1* in the Japanese medaka, *Oryzias latipes* [11], *sdY* in  
79 rainbow trout [12], *amh* in Northern pike, Nile tilapia and pejerrey [13-15], *amhr2* in yellow  
80 perch and the Takifugu pufferfish [16, 17], *gsdf* in sablefish and Luzon medaka, *O. luzonensis*  
81 [18, 19], *gsdf6a* in the turquoise killifish [20] and *sox3* in the Indian ricefish *O. dancena* [21].  
82 MSD turnover can be evolutionarily rapid as has been shown for instance in various ricefish  
83 species [22]. In addition to genetic determinants, environmental factors -- especially  
84 temperature -- have also been shown to play a pivotal role in teleost sex determination [23].  
85 Since the late 1960s, the goldfish sex determination system has been characterized as male  
86 heterogametic (XX/XY) [24]. More recently, a strong temperature influence on sex-ratios has  
87 also been characterized in goldfish, with high rearing temperature treatments inducing complete  
88 masculinization of chromosomally all-female genotypes (XX neomales) when applied during  
89 early 3 months development [25]. The molecular mechanisms of genetic sex determination,

---

90 however, are still unknown not only in goldfish, but also in any member of the Cyprinidae  
91 family.

92 Because of new high throughput sequencing technologies and the availability of a whole  
93 genome sequence assembly for goldfish [26], we implemented both reduced representation (i.e.,  
94 Restriction-site associated DNA sequencing (RAD-seq) [27, 28], and whole genome (i.e., Pool  
95 sequencing (Pool-seq) [29, 30]) approaches to identify sex-linked genetic polymorphisms in  
96 goldfish. We verified that identified sex-linked markers strictly segregated with the Y  
97 chromosome, and we characterized the extent of Y chromosome differentiation. Although our  
98 experiments did not identify a strong candidate sex-determining gene, these results lay a solid  
99 foundation for further molecular exploration of goldfish sex determination.

100

## 101 **RESULTS**

### 102 **Characterization of goldfish sex-linked Y chromosome markers**

103 Because goldfish sex determination is highly sensitive to temperature [21], with high  
104 temperature leading to the masculinization of some XX females producing XX neomales, we  
105 first searched for sex-linked markers using a RAD-seq approach that kept track of phenotypes  
106 and genotypes, potentially enabling the discrimination of XX neomales from XY genetic males.

107 From our RAD-seq data, we identified 32 polymorphic/specific RAD-tags that were present in  
108 12-15 males among the 30 phenotypic males used in this experiment, and completely absent in  
109 all the 30 phenotypic females (Fig. 1A, Supplementary excel file1). These results suggest a  
110 male heterogametic genetic sex determination system (XX/XY) as previously shown in goldfish  
111 [24], but with a rather high occurrence of XX neomales (around 50 %) in this population of

---

112 two-year old animals raised outdoor and obtained from different batches of animals with  
113 different spawning times i.e., from May-June to late September.

114 To validate the hypothesis that these markers were linked to the heterogametic sex (XY) and  
115 the Y chromosome, we first sequenced using Illumina reads and assembled a draft genome  
116 sequence of a male goldfish identified as a putative XY male based on the polymorphic/specific  
117 RAD-tags (see Material & Methods) and blasted these 32 marker sequences against this genome  
118 assembly. This analysis returned 20 contigs with highly significant matches (Supplementary  
119 excel file2) spanning a total of 0.24 Mb. By anchoring these sex-linked RAD sequences on our  
120 genome assembly, we were able to design three putative Y-allele specific primer pairs that were  
121 used to genotype the same individual animals that were used for the RAD-seq analysis. PCR  
122 genotyping using these three primer pairs accurately discriminated putative XY genetic males  
123 from putative XX neomales and females (Fig. 1B), validating that these primers accurately  
124 identified the two types of males found in our RAD-seq analysis. We then genotyped male  
125 breeders from our experimental stock with these primers and selected one putative XX neomale  
126 (breeder 1, negative PCR amplifications) and one putative XY male (breeder 2, positive PCR  
127 amplifications); and both individuals were crossed to the same XX female to generate two  
128 separate batches of fish. If our Y-allele specific primers correctly identify the Y chromosome,  
129 then our putative XX neomale should give only female offspring and the putative XY male  
130 should give both male and female offspring. These two experimental populations were then  
131 reared at low temperature (18°C) during the first three months after fertilization to minimize  
132 high temperature masculinization [25], and were subsequently maintained at 24°C for nine  
133 additional months before the identification of the phenotypic sex. Results from the histological

---

134 examination of the offspring gonads of the putative XX neomale identified 7 fish with testes,  
135 83 fish with ovaries, and 41 fish with undifferentiated gonads. Disregarding fish with  
136 undifferentiated gonads suggests a sex ratio of 7.8% males and 92.2% females for the offspring  
137 of the XX neomale (Table 1). Gonadal histology of the offspring of the putative XY revealed  
138 48 animals with testes, 65 with ovaries, and 14 with undifferentiated gonads, which gives a sex  
139 ratio of 42.5% male and 57.5% female, ignoring the offspring with undifferentiated gonads  
140 (Table 1). These sex ratio differences (Table 1), strongly support the hypothesis that male  
141 breeder 1 is an XX neomale with an offspring sex ratio not significantly different from an  
142 expected all-female population with a slight percentage of female-to-male sex-reversal, and that  
143 breeder 2 is a genetic XY male with an offspring sex ratio not significantly different from an  
144 expected 50:50 sex ratio. In agreement with these results, none of the XX neomale offspring  
145 produced a positive PCR amplification for our three Y-allele specific primer pairs (Figure S3,  
146 Table 2), and all 48 phenotypic males but only one of 65 phenotypic females offspring from the  
147 XY phenotypic male produced positive amplifications (Figure S4, Table 2). This result also  
148 indicates that no neomales were detected in offspring from the XY genetic male if we do not  
149 consider the undetermined individuals compared to the 7.8% of neomales in the XX neomale  
150 offspring population.

151

## 152 **Characterization of the goldfish sex chromosome and sex-determining region (SDR)**

153 Using the three Y-allele specific primer pairs described above, we genotyped goldfish  
154 individuals and selected 30 phenotypic and genotypic males that were used along with 30  
155 phenotypic females to contrast whole genome sex differences by pool-sequencing analysis [29].

---

156 Pool-sequencing reads from the respective XY male and phenotypic female pools were mapped  
157 to the high contiguity goldfish female genome assembly [6] to characterize genomic regions  
158 enriched for sex-biased signals, i.e., sex coverage differences or sex-biased Single Nucleotide  
159 Polymorphism (SNP) differences. Whole genome analysis of SNP distribution (Figure 2)  
160 revealed a strong sex-linked signal in males on linkage group 22 (LG22) and two unplaced  
161 scaffolds (NW\_020523543.1 and NW\_020523609.1) with a high density of observed SNPs  
162 being heterozygous in the male pool and homozygous in the female pool (Y-specific allele).  
163 Interestingly, of the 32 markers found using the RAD-Seq approach, 7 tags were enriched in  
164 the unplaced scaffold NW\_020523543.1 (Fig. 3C), confirming by a second approach that this  
165 scaffold is part of the SD locus in goldfish. These regions with a high density of male-specific  
166 SNPs (Figure 3) are potential sex-determining regions that could contain the goldfish master  
167 sex determining gene. LG22, being the only linkage group with a large sex determining region  
168 (SDR, highlighted by a black box on Fig. 3A, C, D) containing a high-density of male-specific  
169 SNPs (~11.7 Mb), likely corresponds to the goldfish Y sex chromosome.

170 We also observed, however, some smaller signals with less dense sex-linked SNPs in other  
171 linkage groups (Figure 2A) like for instance on LG47 (Fig. S1) with both male and female sex-  
172 linked signals. Interestingly, LG47 is paralogous to LG22 stemming from the Cyprinidae whole  
173 genome duplication [6]. Indeed, due to this recent common ancestry, these two chromosomes  
174 share large homologous and syntenic regions (Fig. S2) that could have resulted in some false  
175 remapping of the pool-sequencing reads leading to some of these secondary minor signals.

176

177 **Identification of candidate SD genes**

---

178 Searches for annotated genes by BLAST within the 20 contigs found in our male goldfish draft  
179 genome assembly based on the RAD-Seq approach did not return any matches for a candidate  
180 SD gene, but mostly transposable elements (Supplementary excel file 3). All genes within the  
181 SDR (N= 373) were extracted because they are potential candidates for being SD gene(s)  
182 (Supplemental excel file 4). Interestingly, among these genes the anti-Mullerian hormone gene  
183 (*amh*) was found at the beginning of the SDR on LG22 (Fig. 3B). This gene has been reported  
184 to be a sex-determining gene in other fish species [14, 15]. However, we did not identify any  
185 male-specific SNPs in the coding sequence of goldfish *amh*. In addition, other male specific  
186 alleles within the 5kb promoter region did not show any sex-linkage.

187

## 188 **DISCUSSION**

189 Though goldfish is an important economic ornamental fish and a useful model for studying  
190 development, evolution, neuroscience, and human disease [3], characterization of goldfish sex-  
191 specific sequences and potential sex chromosomes have not been reported. In this study, we  
192 explored goldfish sex determination using two complementary whole-genome approaches and  
193 found that this species has a XX/XY sex determination system as previously described [24] and  
194 a large, non-recombining sex determination region on LG22. Although RAD-sequencing or  
195 pool-sequencing have been often used separately to explore sex determination in vertebrates  
196 [16, 30, 31], we choose to combine these two approaches in goldfish because of the significant  
197 female-to-male sex reversal induced by temperature [25] that would have prevented a clear  
198 identification of the sex determining region using only a pooled strategy, which mixes genetic  
199 XY males and XX males resulting from the sex reversal of genetic females. Because RAD-



---

200 sequencing keeps track of each individual, we were able to identify sex-reversed individuals in  
201 goldfish that might have masked sex-linked markers in Pool-seq.

202

203 Sex markers identification is an important step to characterize SD systems [32-38]. Using two  
204 complementary whole-genome approaches, we characterized genomic regions containing sex-  
205 linked markers. In goldfish, these sex-linked markers are genomic DNA variations including  
206 gaps, indels and SNPs that present heterozygote polymorphisms in all males and complete  
207 homozygosity in all females. This male-specific heterozygosity pattern agrees with a male  
208 heterogametic XX/XY system as previously reported using progeny testing of hormonally sex-  
209 reversed breeders [24]. We found, however, a strong environmental influence leading to a  
210 relatively high proportion (around 50%) of female-to-male sex-reversal in the first experimental  
211 population that we used for the RAD-Sequencing approach. These animals were actually two-  
212 year old goldfish raised in an outdoor experimental facility and obtained at different spawning  
213 times i.e., from May-June to late September. Some of these animals experienced early  
214 development during summer time at potentially higher temperature and others had their early  
215 developmental period at lower temperatures. Considering the known effects of high temperature  
216 on female-to-male sex reversal in goldfish [25], the fact that some of these fish were exposed  
217 to a high summer temperature could explain this relatively high percentage of female-to-male  
218 sex-reversed animals. This high percentage was not found in our other experiments in which  
219 fish were raised in indoor recirculating system facilities with a tightly controlled low  
220 temperature (18°C) maintained throughout the whole early development phase (3 months). This  
221 situation indeed confirms earlier findings showing that temperature is probably a major trigger

---

222 of neomasculinization in goldfish, but we also found that even at this low temperature there  
223 was still a small percentage of female-to-male sex-reversal (7.8%), suggesting that other  
224 environmental factors, potentially social factors as demonstrated in other species [8, 39], could  
225 also play a role on goldfish sex determination. Apart from goldfish, sex determination in other  
226 teleost fish, including Tilapia [40], medaka [41] and tongue sole [42] is also regulated by  
227 temperature, which overrides the genetic sex determination mechanisms and leads to female-  
228 to-male sex reversal. By developing genetic sexing tools in goldfish that allows the  
229 identification of Y-allele carrying animals, we also brought additional evidence that some of  
230 these phenotypic males were indeed sex-reversed XX genetic females. These genetic sexing  
231 tools are indeed important for better deciphering genetic and environmental sex determination  
232 in goldfish. But these PCR primers could be also used to facilitate the industrial production of  
233 commercial goldfish-related hybrid fish in China [43, 44], by helping to identify neomales i.e.,  
234 XX female-to-male sex reversed animals.

235

236 Sex determination in vertebrates is highly variable with the major exceptions of Eutherian  
237 mammals and birds in which XX/XY and ZZ/ZW monofactorial sex determination systems  
238 have been conserved over a long evolutionary period [45, 46]. In contrast, fish exhibit much  
239 more diverse and dynamic sex determination [9, 10, 47], with monofactorial and polyfactorial  
240 [48, 49] genetic systems and frequent switches and turnovers of master sex-determining genes  
241 [12, 14, 15, 17, 21, 50]. In goldfish, we identified male-specific markers and obvious male-  
242 specific SNPs strongly enriched on LG22. This result confirms that goldfish has an XX-XY  
243 system [24] and also indicated that LG22 is the sex chromosome in that species. Evidence is

---

244 accumulating for the hypothesis that sex chromosomes, in most cases, evolve from autosomes  
245 with *de novo* initial evolution of a new sex determination mechanism that subsequently  
246 becomes fixed and extended by the suppression of recombination on the sex chromosome in  
247 the vicinity of the initial sex locus, which may increase the size of this non recombining sex  
248 determination locus [51]. In goldfish, ~11.7 Mb of LG22 contains numerous male-specific  
249 SNPs. A similar large size of the non-recombining region on the sex chromosomes was also  
250 found in tilapia including 17.9 Mb in *Sarotherodon melanotheron* and 10.7 Mb in *Oreochromis*  
251 *niloticus* [30, 31]. The large non-recombining region on LG22 contains 373 gene models based  
252 on the goldfish genome annotation and also a large number of transposable elements (TEs) that  
253 were found to be strongly enriched in the male specific contigs identified by our RAD-Sex and  
254 our draft genome analysis. Enrichment of TEs around sex loci has been found in other vertebrate  
255 species [52] and may play a crucial role for suppression of recombination leading to an  
256 expansion of sex chromosome divergence.

257

258 With LG22 being the potential sex chromosome in goldfish, it is reasonable to believe that the  
259 non-recombining region that we characterize on LG22 contains the goldfish master sex  
260 determining gene. But the only “usual suspect” master sex determining candidate found in this  
261 region and the additional non-assembled scaffolds containing sex-linked markers is the anti-  
262 Mullerian hormone gene (*amh*) that is located at the beginning of the LG22 non-recombining  
263 region. Duplications of *amh* have been characterized as the master sex determining gene in  
264 different fish species [14, 15], making *Amh* and members of the TGF-beta pathway [17, 19, 20]  
265 likely candidates for this sex-determining function. But we have not been able to characterize

---

266 sex-linked variation neither in the *amh* coding DNA sequence nor in its 5 kb proximal promoter  
267 sequence. Even if we cannot rule out the hypothesis that *amh* regulation could be affected by  
268 sex-specific cis-regulatory elements located very far upstream from *amh*, our results do not  
269 provide any clear and direct evidence that this gene is the goldfish master sex determining gene.  
270 Indeed, not all master sex determining genes are classical “usual suspects” known to be  
271 involved in the sex-differentiation pathway like TGF-beta members [17, 19, 53], Sox3 [21], or  
272 Dmrt1[50, 54]. For instance, the rainbow trout master sex determining gene arose from the  
273 duplication / transposition / evolution of an immune-related gene [12]. This finding suggests  
274 that goldfish could also have an unusual master sex determining gene, preventing an easy and  
275 direct identification just with simple genome-wide analyses and candidate gene approaches.

276

277 The goldfish genome, like the genomes of the common carp and other species of the cyprinid  
278 subfamily cyprininae is characterized by a relatively recent whole genome duplication (WGD)  
279 that occurred approximately 14 million years ago [6]. This WGD adds an extra complexity to  
280 our search for sex-linked regions and sex determining candidate genes because some of these  
281 duplicated regions may still retain large blocks of high sequence similarity. The cyprininae  
282 genome duplication probably explains why we found an additional sex-biased signal on LG47  
283 that stems from the duplication of the same ancestral chromosome that LG22. In addition to the  
284 cyprininae WGD, the current goldfish reference genome sequence [6] was assembled from the  
285 sequences of an XX gynogenetic animal, meaning that the LG22 sex chromosome sequence is  
286 an X chromosome sequence in which potential Y specific regions may be not present. We  
287 indeed produced a first draft genome sequence of an XY male but a higher contiguity male

---

288 genome including long-read technology would be needed to better explore sex-chromosome  
289 differences and characterize potential sex-determining candidates.

290

## 291 **CONCLUSIONS**

292 Our results confirm that sex determination in goldfish is a complex mix of environmental and  
293 genetic factors, and that its genetic sex determination system is male heterogametic (XX/XY).  
294 We also characterized a relatively large non-recombining region (~11.7 Mb) on LG22 that is  
295 likely to be the goldfish Y chromosome. This large non-recombining region on LG22 contains  
296 a single obvious candidate as a potential master sex gene, namely the anti-Mullerian hormone  
297 gene (*amh*). No sex-linked polymorphism, however, was detected in the goldfish *amh* gene and  
298 its 5 kb proximal promoter sequence. Our work provides the foundation required for additional  
299 studies that are now required to better characterize sex determination in goldfish and to  
300 characterize its master sex-determining gene.

301

## 302 **MATERIALS AND METHODS**

### 303 **Experiment fish**

304 Fish used for RAD-seq and Pool-seq were reared outdoors and obtained from different  
305 spawning times i.e., between May-June and late September. Putative XY and XX males were  
306 selected using Y-allele specific primers and these two males were crossed with the same female  
307 to produce two goldfish populations that were incubated and reared indoor at 18°C during three  
308 months after fertilization to minimize the chance of sex reversal induced by temperature  
309 according to previous research [25]. After these 3 months at 18°C, the rearing temperature was  
310 gradually increased to 24°C over a period of 7 days to avoid suddenly dramatic temperature  
311 variation. One-year old fish were euthanized with Tricaine before dissection. Gonads of  
312 goldfish were fixed in Bouin's fixative solution for 24 hours and then embedded gonads were

---

313 cut serially into 7  $\mu\text{m}$  sections and stained with Hematoxylin to characterize ovarian or testicular  
314 features. Fin clips were stored in 90% alcohol for DNA extraction and genotyping. Statistics  
315 were applied to test for significant sex ratio differences and genotype/phenotype sex-linkage  
316 with a Chi-squared test ( $p < 0.05$ ).

317

### 318 **DNA extraction and genotyping**

319 For genotyping, fin clips were lysed with 5% Chelex and 20 mg Proteinase K at 55°C for 2  
320 hours, and subsequently denatured by Proteinase K at 99°C for 2 min. Supernatant containing  
321 genomic DNA (gDNA) was collected to a new tube after a brief centrifugation. Finally, DNA  
322 was diluted to half and stored at -20°C. For genome sequencing, gDNA was extracted with  
323 NucleoSpin Kits for Tissue (Macherey-Nagel, Duren, Germany) following the manufacturer's  
324 instructions. gDNA concentration and quality were measured with a NanoDrop ND2000  
325 spectrophotometer (Thermo Scientific, Wilmington, DE) and a Qubit3 fluorometer (Invitrogen,  
326 Carlsbad, CA).

327 Primers were designed from the sequences of male-biased contigs for sex genotyping and a  
328 positive control (Table S1) based on contig flattened\_line\_0 from our Illumina male genome  
329 assembly (Accession number: WSJC00000000) using Primer3 version 0.4.0  
330 (<http://primer3.ut.ee>). PCRs were performed with 0.1  $\mu\text{M}$  of each primer, 50 ng of gDNA  
331 adjusted at 50 ng/ $\mu\text{l}$ , 100  $\mu\text{M}$  dNTP mixture, and 1  $\mu\text{l}$  of 10 $\times$  PCR Buffer (Sigma Aldrich) with  
332 0.25 units of JumpStart Taq DNA Polymerase (Sigma Aldrich) in a total volume of 25  $\mu\text{l}$ . The  
333 PCR thermal cycle procedures were: 94°C for 30s for denaturing, 58°C for 30s for annealing  
334 and 72°C for 30s for extending for 35 cycles. Finally, PCR products were electrophoresed on

---

335 1.5% agarose gels.

336

337 **Restriction-site association sequencing (RAD-seq) and male-marker discovery**

338 Genomic DNA was extracted from 30 males and 30 females and digest with the restriction  
339 enzyme *SbfI* for constructing a RAD-seq library according to standard protocols [55]. Briefly,  
340 for each sample, 1µg of DNA was digested using *SbfI*. Digested DNA was purified using  
341 AMPure PX magnetic beads (Beckman Coulters) and ligated to indexed P1 adapters (one index  
342 per sample) using concentrated T4 DNA ligase (NEB). Ligated DNA was purified using  
343 AMPure XP magnetic beads. Each sample was quantified using microfluorimetry (Qubit  
344 dsDNA HS assay kit, Thermofisher) and all samples were pooled in equal amount. The pool  
345 was fragmented on a Biorputor (Diagenode) and purified using a Minelute column (Qiagen).  
346 Sonicated DNA was size selected on an 1,5 % agarose cassette aiming for an insert size of 300  
347 bp to 500 bp. Size selected DNA was extracted from the gel using the Qiaquick gel extraction  
348 kit (Qiagen), repaired using the End-It DNA-end repair kit (Tebu Bio) and adenylated on its 3'  
349 ends using Klenow (exo-) (Tebu-Bio). P2 adapter was ligated using concentrated T4 DNA  
350 ligase (NEB) and 50 ng of the ligated product was engaged in a 12 cycles PCR. After AMPure  
351 XP beads purification, the resulting library was checked on a Bioanalyzer (Agilent) using the  
352 DNA 1000 kit and quantified by qPCR using the KAPA Library quantification kit (Roche, ref.  
353 KK4824). The library was sequenced on one lane of Hiseq2500 in single read 100nt mode using  
354 the clustering and SBS v3 kit following the manufacturer's instructions.

355 Raw reads were demultiplexed with the program *process\_radtags.pl* of Stacks with default  
356 settings. 135,019,110 (79.1%) reads were kept after this procedure. Demultiplexed reads were

---

357 subsequently processed by the RADSex software version 2.0.0  
358 (<http://github.com/RomainFeron/RadSex>). The distribution of sequences between male and  
359 female were calculated with function *distrib* with all settings to default. This distribution of  
360 sequences was visualized with *plot\_sex\_distribution* function of *radsex-vis*  
361 (<http://github.com/RomainFeron/RADSex-vis>) (Fig 1.A). Sequences significantly associated  
362 with sex were extracted using the function *signif*, which identifies sex-bias tags.  
363 Male-biased tags were compared to the male *de novo* assembly with *ncbi-blast+* (version: 2.6.0)  
364 setting the e-value cutoff to  $1^{e-20}$  to identify long, homologous male-biased contigs. Male  
365 specific PCR primers were designed from these contigs sequences (see Table S1) using Primer3  
366 version 0.4.0 (<http://primer3.ut.ee>).

367

### 368 **Pooled genome sequencing (Pool-seq) and sex differentiated region identification**

369 Genomic DNA extracted from the fin clips of 13 phenotypic females and 13 genotypic males  
370 selected from the animals used for the RAD-Seq experiment, were used for the Pool-Seq  
371 analysis. The 13 genotypic males were genotyped using the three Y-allele PCR primers  
372 described above. Genomic DNA were pooled in equimolar ratio according to sex and Pool-  
373 seq libraries were generated using the Truseq nano DNA sample prep kit (Illumina, ref. FC-  
374 121-4001) following the manufacturer's instructions. Briefly, each pool was sonicated using a  
375 Bioruptor (Diagenode). The sonicated pools were repaired, size selected on magnetic beads  
376 aiming for a 550 pb insert size and adenylated on their 3' ends. Adenylated DNA was ligated to  
377 Illumina's specific adapters and, after purification on magnetic beads, was amplified in an 8  
378 cycles PCR. Libraries were purified using magnetic beads, checked on a Fragment Analyzer



---

379 (Agilent) using the HS NGS Fragment kit (DNF-474-33) and quantified by qPCR using the  
380 KAPA Library quantification kit (Roche, ref. KK4824). Each library was sequenced on half a  
381 lane of a rapid v2 flow cell (Illumina) in paired end 2x250nt mode.

382 Reads from the male and female pools were remapped to a genome sequence coming from a  
383 gynogenesis-derived female [QPKE00000000] using BWA mem version 0.7.17 with default  
384 parameters. Then, BAM files were sorted and merged with Picard tools version 2.18.2 with  
385 default parameters. After that, PCR duplicates were removed with Picard tools. Reads with  
386 mapping quality less than 20 and that did not map uniquely were also removed with Samtools  
387 version 1.8. Subsequently, the two sex BAM files were used to generate a pileup file using  
388 samtools mpileup with per-base alignment quality disabled (-B). A sync file was created using  
389 popoolation mpileup2sync version 1.201 (parameters: --min-qual 20), which contains the  
390 nucleotide composition of each sex for each position in the reference. Finally, with this sync  
391 file, SNPs and coverage between the two sexes of all reference positions were overall calculated  
392 with PSASS (version 2.0.0, doi:10.5281/zenodo.2615936). We used a 100kb sliding window  
393 with an output point every 500bp to identify sex-specific SNPs enriched regions with PSASS.  
394 The PSASS parameters were as follows: minimum depth set to 10 (--min-depth 10), range of  
395 heterozygous SNP frequency for a sex-linked locus  $0.5 \pm 0.2$  (--freq-het 0.5, --range-het 0.2),  
396 homologous SNP frequency for a sex-linked locus  $>0.98$  (--freq-hom 1, --range-hom 0.02),  
397 overlapped sliding window (--window-size 100000, --output-resolution 500). Data  
398 visualization was implemented with an R package ([http://github.com/RomainFeron/PSASS-](http://github.com/RomainFeron/PSASS-vis)  
399 [vis](#)).

400

---

401 **Sequencing and *de novo* assembly of a goldfish male genome**

402 One genetic male was selected for *de novo* assembly using the Y-specific primers described  
403 above. Library was generated using the Truseq nano DNA sample prep kit (Illumina, ref. FC-  
404 121-4001) following the manufacturer's instructions. Briefly, DNA from a single male  
405 individual was sonicated using a Bioruptor (Diagenode). The sonicated DNA was repaired, size  
406 selected on magnetic beads aiming for a 550 pb insert size and adenylated on its 3' ends.  
407 Adenylated DNA was ligated to Illumina's specific adapters and, after purification on magnetic  
408 beads, was amplified in an 8 cycles PCR. Library was purified using magnetic beads, checked  
409 on a Fragment Analyzer (Agilent) using the HS NGS Fragment kit (DNF-474-33) and  
410 quantified by qPCR using the KAPA Library quantification kit (Roche, ref. KK4824). The  
411 library was sequenced on one lane of a rapid v2 flow cell (Illumina) in paired end 2\*250nt  
412 mode. Illumina paired-end reads were assembled using DiscoverDeNovo (reference  
413 <https://software.broadinstitute.org/software/discover/blog/>) with standard parameters.

414

415 **ABBREVIATIONS:** RAD-seq: Restriction site-associated DNA sequencing; SNP: Single  
416 nucleotide polymorphism; SD: Sex determination; SDR: Sex differentiated region, MSD:  
417 master sex determining genes.

418

419 **DECLARATIONS**

420 **Ethics approval:** Research involving animal experimentation conformed to the principles for  
421 the use and care of laboratory animals, in compliance with French ("National Council for  
422 Animal Experimentation" of the French Ministry of Higher Education and Research and the

---

423 Ministry of Food, Agriculture, and Forest) and European (European Communities Council  
424 Directive 2010/63/UE) guidelines on animal welfare.

425

426 **Consent for publication:** Not applicable

427

428 **Availability of data and material:** This Whole Genome Shotgun project has been deposited  
429 at DDBJ/ENA/GenBank under the accession WSJC00000000. The version described in this  
430 paper is version WSJC01000000. Genome sequencing reads of the male genome, the male and  
431 female pool-sequencing reads and the RAD-seq demultiplexed sequences have been deposited  
432 in the Sequence Read Archive (SRA), under BioProject PRJNA592334.

433

434 **Competing interests:** The authors declare that they have no competing interests.

435

436 **Funding:** This project was supported by funds from the “Agence Nationale de la Recherche”  
437 and the “Deutsche Forschungsgemeinschaft” (ANR/DFG, PhyloSex project, 2014-2016) to MS  
438 and YG. Montpellier Genomics (MGX) facility was supported by France Génomique National  
439 infrastructure, funded as part of “Investissement d’avenir” program managed by Agence  
440 Nationale pour la Recherche (contract ANR-10-INBS-09). This work was also supported by  
441 Grant-in-Aid for Scientific Research (19K22426) to YO, and grants R01OD011116 and  
442 5R01GM085318 from the USA National Institutes of Health to JHP.

443

444 **Authors' contributions:**

445 Conceived and designed the experiments: YG, MW

---

446 Funding acquisition: YG, MS, JP, LJ

447 Investigation: MW, MP, JG, EJ, AH, CR, HP, SB, YO

448 Bioinformatics analysis: RF, CK, CC, MZ

449 Visualization: MW

450 Wrote the paper: MW, YG

451

452 **Acknowledgements:** We are grateful to the Genotoul bioinformatics platform Toulouse Midi-

453 Pyrenees (Bioinfo Genotoul) for providing computing and/or storage resources and to the

454 INRA-LPGP experimental facilities for taking care of goldfish experiments.

455

456 **Supplementary information**

457 **Supplementary excel file 1:** Sequences of putative Y-allele RAD-tags (N= 32) found in some

458 males but absent from all females.

459 **Supplementary excel file 2:** Contigs from a goldfish Illumina male genome assembly with

460 homologies with the putative Y-allele RAD-tags.

461 **Supplementary excel file 3:** Annotation of potential Y chromosome contigs by sequence

462 comparisons to NCBI Non-redundant protein sequence database using blastx.

463 **Supplementary excel file 4:** Detailed information of annotated genes in the goldfish sex

464 determination regions extracted from the NCBI genome annotation file (accession number

465 QPKE00000000).

---

## REFERENCES

1. Blanco AM, Sundarrajan L, Bertucci JI, Unniappan S: **Why goldfish? Merits and challenges in employing goldfish as a model organism in comparative endocrinology research.** *General and comparative endocrinology* 2018, **257**:13-28.
2. Popesku JT, Martyniuk CJ, Mennigen J, Xiong H, Zhang D, Xia X, Cossins AR, Trudeau VL: **The goldfish (*Carassius auratus*) as a model for neuroendocrine signaling.** *Molecular and cellular endocrinology* 2008, **293**(1-2):43-56.
3. Omori Y, Kon T: **Goldfish: an old and new model system to study vertebrate development, evolution and human disease.** *J Biochem* 2019, **165**(3):209-218.
4. Ota KG, Abe G: **Goldfish morphology as a model for evolutionary developmental biology.** *Wiley Interdisciplinary Reviews: Developmental Biology* 2016, **5**(3):272-295.
5. Choe Y, Yu JE, Park J, Park D, Oh J-I, Kim S, Moon KH, Kang HY: **Goldfish, *Carassius auratus*, as an infection model for studying the pathogenesis of *Edwardsiella piscicida*.** *Veterinary research communications* 2017, **41**(4):289-297.
6. Chen Z, Omori Y, Koren S, Shirokiya T, Kuroda T, Miyamoto A, Wada H, Fujiyama A, Toyoda A, Zhang S: **De novo assembly of the goldfish (*Carassius auratus*) genome and the evolution of genes after whole-genome duplication.** *Science Advances* 2019, **5**(6):eaav0547.
7. Mohammad T, Moulick S, Mukherjee CK: **Economic feasibility of goldfish (*Carassius auratus* Linn.) recirculating aquaculture system.** *Aquaculture Research* 2018, **49**(9):2945-2953.
8. Devlin RH, Nagahama Y: **Sex determination and sex differentiation in fish: an overview of genetic, physiological, and environmental influences.** *Aquaculture* 2002, **208**(3-4):191-364.
9. Pan Q, Anderson J, Bertho S, Herpin A, Wilson C, Postlethwait JH, Schartl M, Guiguen Y: **Vertebrate sex-determining genes play musical chairs.** *C R Biol* 2016, **339**(7-8):258-262.
10. Herpin A, Schartl M: **Plasticity of gene-regulatory networks controlling sex determination: of masters, slaves, usual suspects, newcomers, and usurpaters.** *EMBO reports* 2015, **16**(10):1260-1274.
11. Matsuda M, Nagahama Y, Shinomiya A, Sato T, Matsuda C, Kobayashi T, Morrey CE, Shibata N, Asakawa S, Shimizu N: **DMY is a Y-specific DM-domain gene required for male development in the medaka fish.** *Nature* 2002, **417**(6888):559.
12. Yano A, Guyomard R, Nicol B, Jouanno E, Quillet E, Klopp C, Cabau C, Bouchez O, Fostier A, Guiguen Y: **An immune-related gene evolved into the master sex-determining gene in rainbow trout, *Oncorhynchus mykiss*.** *Curr Biol* 2012, **22**(15):1423-1428.
13. Hattori RS, Murai Y, Oura M, Masuda S, Majhi SK, Sakamoto T, Fernandino JI, Somoza GM, Yokota M, Strüssmann CA: **A Y-linked anti-Müllerian hormone duplication takes over a critical role in sex determination.** *Proceedings of the National Academy of Sciences* 2012, **109**(8):2955-2959.
14. Li M, Sun Y, Zhao J, Shi H, Zeng S, Ye K, Jiang D, Zhou L, Sun L, Tao W *et al*: **A Tandem Duplicate of Anti-Müllerian Hormone with a Missense SNP on the Y**

- 
- Chromosome Is Essential for Male Sex Determination in Nile Tilapia, *Oreochromis niloticus*.** *PLOS Genetics* 2015, **11**(11):e1005678.
15. Pan Q, Feron R, Yano A, Guyomard R, Jouanno E, Vigouroux E, Wen M, Busnel J-M, Bobe J, Concordet J-P: **Identification of the master sex determining gene in Northern pike (*Esox lucius*) reveals restricted sex chromosome differentiation.** *BioRxiv* 2019:549527.
  16. Feron R, Zahm M, Cabau C, Klopp C, Roques C, Bouchez O, Eche C, Valiere S, Donnadiou C, Haffray P: **Characterization of a Y-specific duplication/insertion of the anti-Mullerian hormone type II receptor gene based on a chromosome-scale genome assembly of yellow perch, *Perca flavescens*.** *BioRxiv* 2019:717397.
  17. Kamiya T, Kai W, Tasumi S, Oka A, Matsunaga T, Mizuno N, Fujita M, Suetake H, Suzuki S, Hosoya S *et al*: **A trans-species missense SNP in *Amhr2* is associated with sex determination in the tiger pufferfish, *Takifugu rubripes* (fugu).** *PLoS Genet* 2012, **8**(7):e1002798.
  18. Rondeau EB, Messmer AM, Sanderson DS, Jantzen SG, von Schalburg KR, Minkley DR, Leong JS, Macdonald GM, Davidsen AE, Parker WA: **Genomics of sablefish (*Anoplopoma fimbria*): expressed genes, mitochondrial phylogeny, linkage map and identification of a putative sex gene.** *BMC genomics* 2013, **14**(1):452.
  19. Myosho T, Otake H, Masuyama H, Matsuda M, Kuroki Y, Fujiyama A, Naruse K, Hamaguchi S, Sakaizumi M: **Tracing the emergence of a novel sex-determining gene in medaka, *Oryzias luzonensis*.** *Genetics* 2012, **191**(1):163-170.
  20. Reichwald K, Petzold A, Koch P, Downie Bryan R, Hartmann N, Pietsch S, Baumgart M, Chalopin D, Felder M, Bens M *et al*: **Insights into Sex Chromosome Evolution and Aging from the Genome of a Short-Lived Fish.** *Cell* 2015, **163**(6):1527-1538.
  21. Takehana Y, Matsuda M, Myosho T, Suster ML, Kawakami K, Shin IT, Kohara Y, Kuroki Y, Toyoda A, Fujiyama A *et al*: **Co-option of *Sox3* as the male-determining factor on the Y chromosome in the fish *Oryzias dancena*.** *Nat Commun* 2014, **5**:4157.
  22. Matsuda M, Sakaizumi M: **Evolution of the sex-determining gene in the teleostean genus *Oryzias*.** *General and comparative endocrinology* 2016, **239**:80-88.
  23. Ospina-Alvarez N, Piferrer F: **Temperature-dependent sex determination in fish revisited: prevalence, a single sex ratio response pattern, and possible effects of climate change.** *PloS one* 2008, **3**(7):e2837.
  24. Yamamoto TO, Kajishima T: **Sex hormone induction of sex reversal in the goldfish and evidence for male heterogamity(XX/XY).** *Journal of Experimental Zoology* 1968, **168**(2):215-221.
  25. Goto-Kazeto R, Abe Y, Masai K, Yamaha E, Adachi S, Yamauchi K: **Temperature-dependent sex differentiation in goldfish: Establishing the temperature-sensitive period and effect of constant and fluctuating water temperatures.** *Aquaculture* 2006, **254**(1-4):617-624.
  26. Chen Z, Omori Y, Koren S, Shirokiya T, Kuroda T, Miyamoto A, Wada H, Fujiyama A, Toyoda A, Zhang S *et al*: **De Novo assembly of the goldfish (*Carassius auratus*) genome and the evolution of genes after whole genome duplication.** 2018.
  27. Anderson JL, Mari AR, Braasch I, Amores A, Hohenlohe P, Batzel P, Postlethwait JH: **Multiple sex-associated regions and a putative sex chromosome in zebrafish**

- 
- revealed by RAD mapping and population genomics. *PloS one* 2012, **7**(7):e40701.
28. Gamble T: **Using RAD-seq to recognize sex-specific markers and sex chromosome systems.** *Molecular ecology* 2016, **25**(10):2114-2116.
29. Schlötterer C, Tobler R, Kofler R, Nolte V: **Sequencing pools of individuals—mining genome-wide polymorphism data without big funding.** *Nature Reviews Genetics* 2014, **15**(11):749-763.
30. Gammerdinger WJ, Conte MA, Baroiller J-F, D’cotta H, Kocher TD: **Comparative analysis of a sex chromosome from the blackchin tilapia, *Sarotherodon melanotheron*.** *BMC genomics* 2016, **17**(1):808.
31. Gammerdinger WJ, Conte MA, Acquah EA, Roberts RB, Kocher TD: **Structure and decay of a proto-Y region in Tilapia, *Oreochromis niloticus*.** *Bmc Genomics* 2014, **15**(1):975.
32. Kincaid-Smith J, Boissier J, Allienne JF, Oleaga A, Djuikwo-Teukeng F, Toulza E: **A Genome Wide Comparison to Identify Markers to Differentiate the Sex of Larval Stages of *Schistosoma haematobium*, *Schistosoma bovis* and their Respective Hybrids.** *PLoS Negl Trop Dis* 2016, **10**(11):e0005138.
33. Charlesworth D, Mank JE: **The birds and the bees and the flowers and the trees: lessons from genetic mapping of sex determination in plants and animals.** *Genetics* 2010, **186**(1):9-31.
34. Pan ZJ, Li XY, Zhou FJ, Qiang XG, Gui JF: **Identification of Sex-Specific Markers Reveals Male Heterogametic Sex Determination in *Pseudobagrus ussuriensis*.** *Mar Biotechnol (NY)* 2015, **17**(4):441-451.
35. Carmichael SN, Bekaert M, Taggart JB, Christie HR, Bassett DI, Bron JE, Skuce PJ, Gharbi K, Skern-Mauritzen R, Sturm A: **Identification of a sex-linked SNP marker in the salmon louse (*Lepeophtheirus salmonis*) using RAD sequencing.** *PLoS One* 2013, **8**(10):e77832.
36. Kafkas S, Khodaeiaminjan M, Guney M, Kafkas E: **Identification of sex-linked SNP markers using RAD sequencing suggests ZW/ZZ sex determination in *Pistacia vera* L.** *BMC Genomics* 2015, **16**:98.
37. Gamble T, Zarkower D: **Identification of sex-specific molecular markers using restriction site-associated DNA sequencing.** *Mol Ecol Resour* 2014, **14**(5):902-913.
38. Fowler BL, Buonaccorsi VP: **Genomic characterization of sex-identification markers in *Sebastes carnatus* and *Sebastes chrysomelas* rockfishes.** *Mol Ecol* 2016, **25**(10):2165-2175.
39. Kobayashi Y, Nagahama Y, Nakamura M: **Diversity and plasticity of sex determination and differentiation in fishes.** *Sex Dev* 2013, **7**(1-3):115-125.
40. Wessels S, Hörstgen-Schwark G: **Temperature dependent sex ratios in selected lines and crosses with a YY-male in Nile tilapia (*Oreochromis niloticus*).** *Aquaculture* 2011, **318**(1-2):79-84.
41. Hattori R, Gould R, Fujioka T, Saito T, Kurita J, Strüssmann C, Yokota M, Watanabe S: **Temperature-dependent sex determination in Hd-rR medaka *Oryzias latipes*: gender sensitivity, thermal threshold, critical period, and DMRT1 expression profile.** *Sexual Development* 2007, **1**(2):138-146.
42. Shao C, Li Q, Chen S, Zhang P, Lian J, Hu Q, Sun B, Jin L, Liu S, Wang Z: **Epigenetic**

- 
- modification and inheritance in sexual reversal of fish.** *Genome research* 2014, **24**(4):604-615.
43. Wen M, Peng L, Hu X, Zhao Y, Liu S, Hong Y: **Transcriptional quiescence of paternal mtDNA in cyprinid fish embryos.** *Scientific reports* 2016, **6**:28571.
44. Xu K, Wen M, Duan W, Ren L, Hu F, Xiao J, Wang J, Tao M, Zhang C, Wang J: **Comparative analysis of testis transcriptomes from triploid and fertile diploid cyprinid fish.** *Biology of reproduction* 2015, **92**(4):95, 91-12.
45. Wallis M, Waters P, Graves J: **Sex determination in mammals—before and after the evolution of SRY.** *Cellular and molecular life sciences* 2008, **65**(20):3182.
46. Ellegren H: **Evolution of the avian sex chromosomes and their role in sex determination.** *Trends in Ecology & Evolution* 2000, **15**(5):188-192.
47. Mank JE, Avise JC: **Evolutionary Diversity and Turn-Over of Sex Determination in Teleost Fishes.** *Sexual Development* 2009, **3**(2-3):60-67.
48. Roberts NB, Juntti SA, Coyle KP, Dumont BL, Stanley MK, Ryan AQ, Fernald RD, Roberts RB: **Polygenic sex determination in the cichlid fish *Astatotilapia burtoni*.** *BMC Genomics* 2016, **17**:835.
49. Liew WC, Bartfai R, Lim Z, Sreenivasan R, Siegfried KR, Orban L: **Polygenic Sex Determination System in Zebrafish.** *PLOS ONE* 2012, **7**(4):e34397.
50. Cui Z, Liu Y, Wang W, Wang Q, Zhang N, Lin F, Wang N, Shao C, Dong Z, Li Y: **Genome editing reveals *dmrt1* as an essential male sex-determining gene in Chinese tongue sole (*Cynoglossus semilaevis*).** *Scientific reports* 2017, **7**:42213.
51. Wright AE, Dean R, Zimmer F, Mank JE: **How to make a sex chromosome.** *Nat Commun* 2016, **7**:12087.
52. Chalopin D, Volf JN, Galiana D, Anderson JL, Schartl M: **Transposable elements and early evolution of sex chromosomes in fish.** *Chromosome Res* 2015, **23**(3):545-560.
53. Rondeau EB, Laurie CV, Johnson SC, Koop BF: **A PCR assay detects a male-specific duplicated copy of Anti-Müllerian hormone (*amh*) in the lingcod (*Ophiodon elongatus*).** *BMC research notes* 2016, **9**(1):230.
54. Nanda I, Kondo M, Hornung U, Asakawa S, Winkler C, Shimizu A, Shan Z, Haaf T, Shimizu N, Shima A *et al*: **A duplicated copy of *DMRT1* in the sex-determining region of the Y chromosome of the medaka, *Oryzias latipes*.** *Proc Natl Acad Sci U S A* 2002, **99**(18):11778-11783.
55. Baird NA, Etter PD, Atwood TS, Currey MC, Shiver AL, Lewis ZA, Selker EU, Cresko WA, Johnson EA: **Rapid SNP discovery and genetic mapping using sequenced RAD markers.** *PLoS One* 2008, **3**(10):e3376.



---

**TABLES:**

**Table 1. Statistics of phenotypic sex in two populations**

| Population | N. of male | N. of female | N. of fish with undetermined sex | Sex ratio: %♂/♀ | Significance ( $\neq 0\%♂/100\%♀$ ) | Significance ( $\neq 50\%♂/50\%♀$ ) |
|------------|------------|--------------|----------------------------------|-----------------|-------------------------------------|-------------------------------------|
| P(XX)      | 7          | 83           | 41                               | 8.4             | *                                   | ***                                 |
| P(XY)      | 48         | 65           | 14                               | 73.8            | ***                                 | NS                                  |

P(XX): putative neomale (XX) offspring population; P(XY): putative genetic male (XY) offspring population; NS: Non-significant.

Chi-squared test was applied for statistics in R

**Table 2. Goldfish Y-allele sex-linkage**

| Population | Male <sup>#</sup> | Female <sup>#</sup> | Undetermined sex <sup>#</sup> | Sex linkage |
|------------|-------------------|---------------------|-------------------------------|-------------|
| P(XX)      | 0 / 7             | 0 / 83              | 0 / 41                        | NS          |
| P(XY)      | 48 / 48           | 1 / 65              | 10 / 14                       | ***         |

<sup>#</sup> Y-allele positive genotyping / total number of samples. P(XX): putative neomale (XX) offspring population; P(XY): putative genetic male (XY) offspring population; NS: Non-significant. Fisher's exact test was applied for statistics in R

**Table S1. Sequences of the primers used for Y-allele genotyping in goldfish.**

| Primers          |                                                                        | PCR product (bp) | Genome location                     |                      |
|------------------|------------------------------------------------------------------------|------------------|-------------------------------------|----------------------|
| names            | Sequence(5' - 3')                                                      |                  | Male assembly                       | NCBI_genome          |
| Marker 1         | Forward: AATACAACATTCCCAGGGAGTGCA<br>Reverse: CATCAAGGGCTATCTGACCAAGA  | 1169             | Flattened_line_39456<br>0:620-1788  | NW_020523543.1       |
| Marker 2         | Forward: GTGCTCAATAGACGACGGATTCTC<br>Reverse: GTCTGTCTGTTAGCCTGTTCTCCA | 1189             | Flattened_line_27079<br>8:2006-3194 | NW_020525535.1       |
| Marker 3         | Forward: GATGAAGGTCTCGGTCTGTTGTTA<br>Reverse: CCCTGTTATGTTTGTATTGGCTAC | 2548             | Flattened_line_35862:<br>4409-6956  | NC_039250.1<br>(LG8) |
| Positive control | Forward: AAGAGCGCCTCCTAGTGTTT<br>Reverse: GAGACGGAGGAGTGGTATCG         | 994              | Flattened_line_0:6858<br>-7842      | NC_039245.1<br>(LG3) |

Three Y-allele primer pairs (marker 1 to 3) and one autosomal primer pair (positive control) were designed on our XY male genome assembly (male assembly). Name of the contig and nucleotide position (3'-5') are given in the genome location column.

**FIGURES:**

**Figure 1**

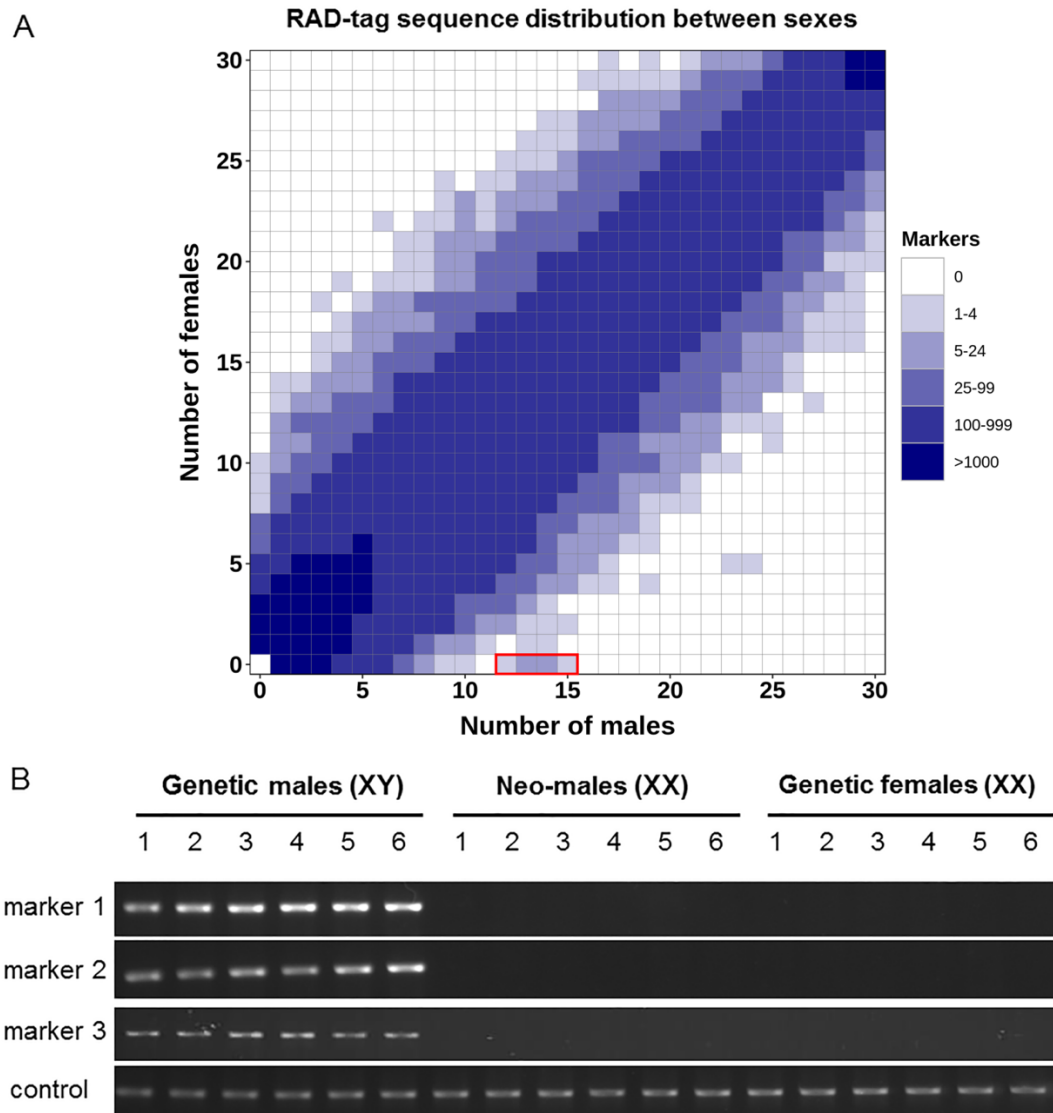

**Figure 1. RAD-sex tags and male-specific markers in goldfish. (A)** Haplotypes heatmap in phenotypic males and females' goldfish. Each cell in the heatmap represents the number of haplotypes presented in x phenotypic males and y phenotypic females (x: cumulative number of males, y: cumulative number of females). Haplotypes present in more than 12 males and absent in all females were identified as male-specific haplotypes (highlighted by red box). **(B)** Genotyping of goldfish males and females with three Y-allele primer pairs and one autosomal primer used as a positive control. Goldfish are categorized into three groups i.e., putative genetic males (XY), putative XX neomales, and genetic females by combining the results of both Y-allele genotyping and sex phenotyping.

**Figure 2**

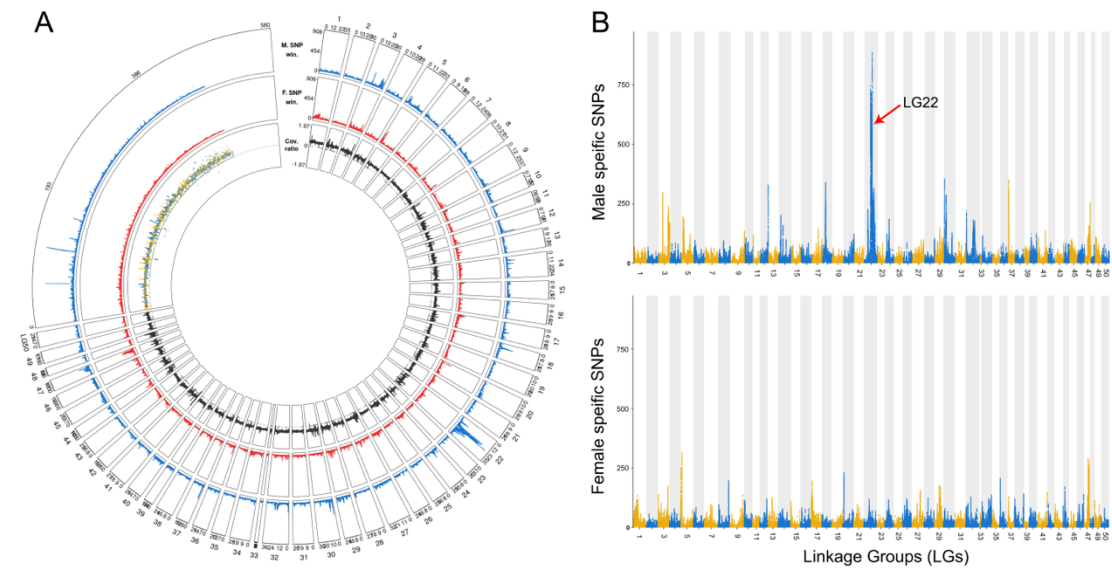

**Figure 2. Sex determining regions identified by remapping the Pool-seq male and female reads onto the female genome assembly.** SNPs were counted using 100kb sliding window with an output point every 500bp. **(A)** Circular plot showing the genome wide metrics of the Pool-seq analysis. All the 50 goldfish linkage groups (LGs) are labelled with their LG number and all unplaced scaffolds are fused together. Outer to inner tracks show respectively: the male-specific SNPs, the female-specific SNPs, and the reads depth ratio between males and females. **(B)** Manhattan plot of the male- and female-specific SNPs showing a strong enrichment of male-specific SNPs on LG22.

**Figure 3**

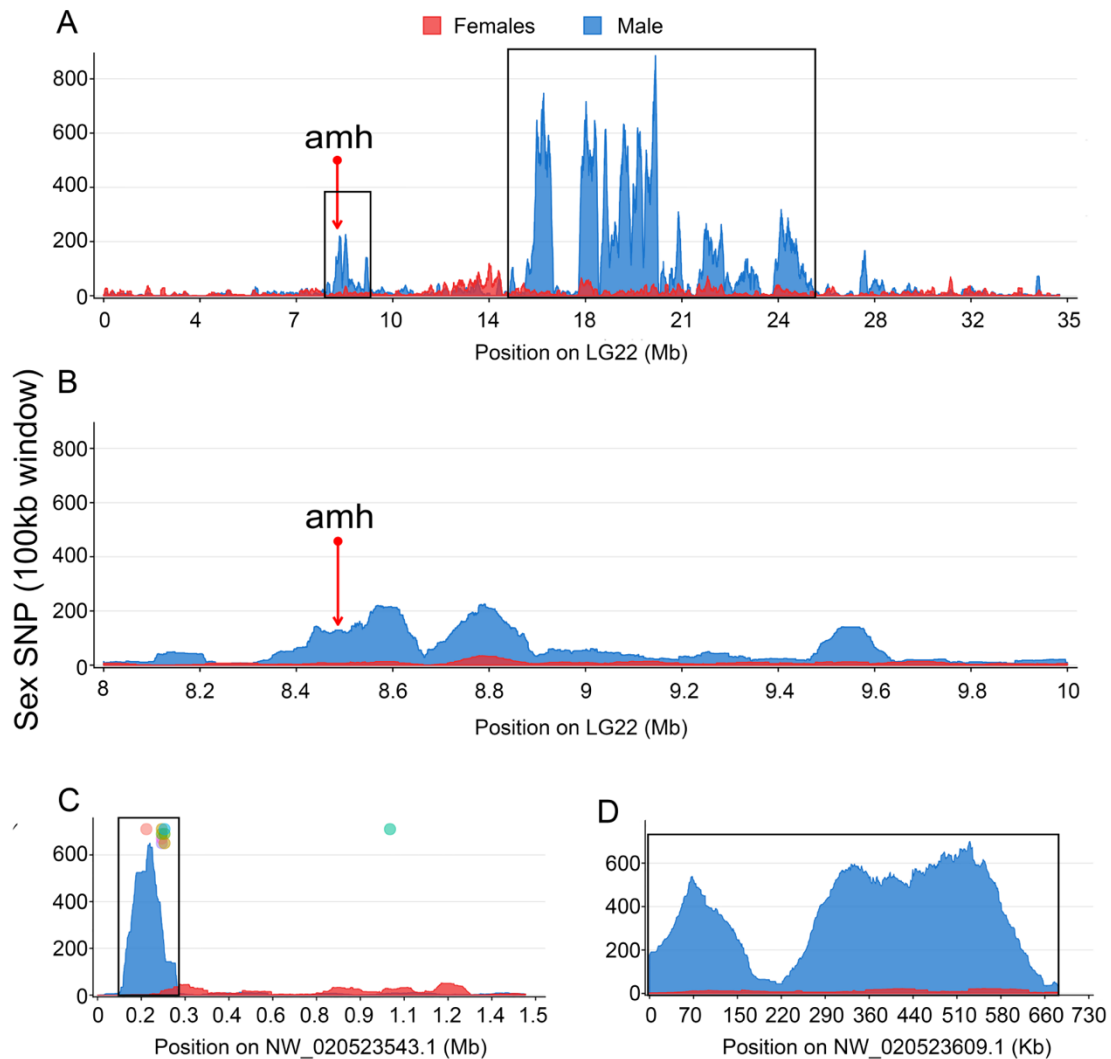

**Figure 3. Distribution of male-specific SNPs on LG22 and unplaced scaffolds NW\_020523543.1 and NW\_020523609.1.** SNPs were counted using 100kb sliding window with an output point every 500bp and female- and male-specific SNPs were respectively indicated by red and blue color. (A) A large sex-determination region was identified on LG22, which is highlighted with a black box. The candidate sex-determining gene *amh* is located on this LG22, but not in the high density, male-specific SNP region. The region from 8Mb to 10Mb containing *amh* is zoomed in panel (B). (C) The NW\_020523543.1 unplaced scaffold exhibits a region around 0.1Mb harboring a small region (200 kb) with a high-density of male-specific SNPs. Meanwhile, sequence comparisons demonstrate that 7 male-biased RAD-tags (colored circles) on a total of 32 map with a high identity onto this scaffold. In contrast, few female-specific SNPs were enriched on this scaffold (red area). (D) The unplaced NW\_020523609.1 scaffold is enriched in male-specific SNPs.

## SUPPLEMENTARY FIGURES

Figure S1

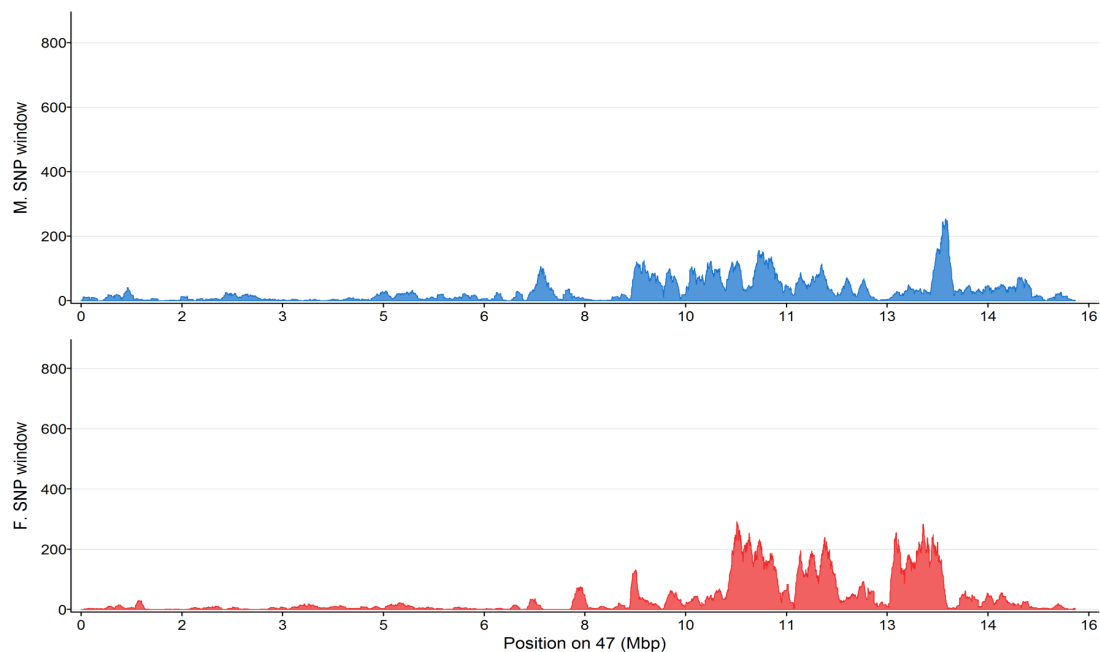

**Figure S1: Distribution of sex-biased SNPs on LG47.** SNPs were counted using 100kb sliding window with an output point every 500bp. The top panel displays the profile of male-specific SNPs (blue area), while the bottom panel displays the profile of female-specific SNPs (red area).

Figure S2

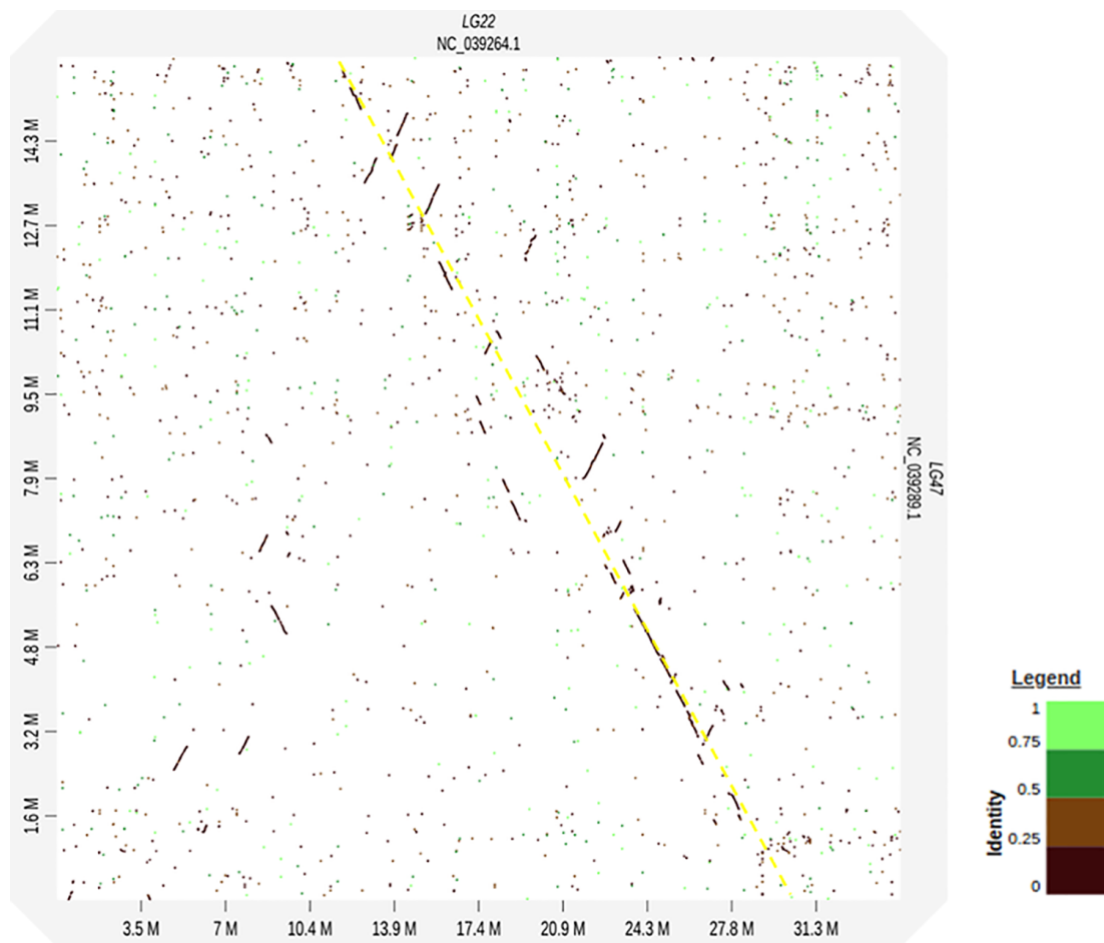

**Figure S2:** Dot plot comparison of LG22 and LG47 showing conserved synteny between these two linkage groups.

Figure S3

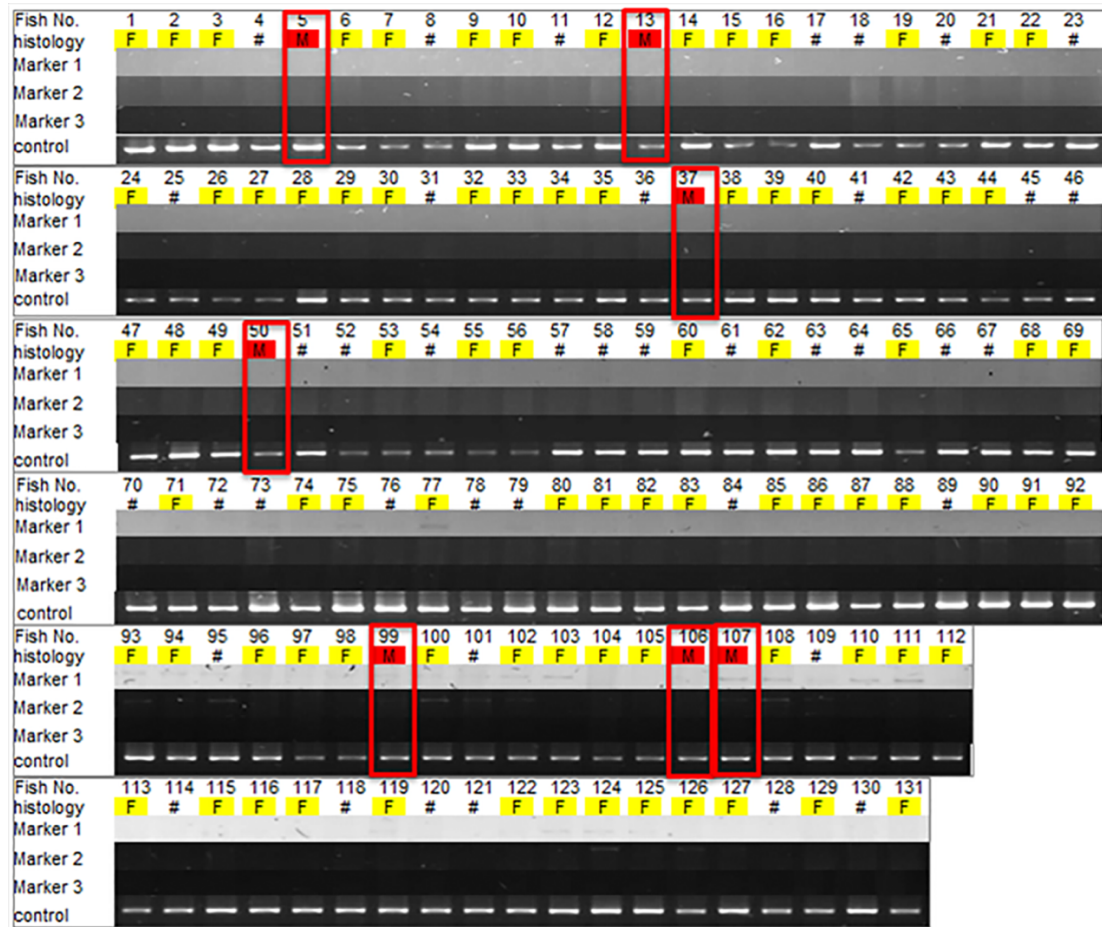

**Figure S3:** Sex genotyping with Y-allele primers of the offspring of a putative XX neomale with a normal XX female. Genotyping was conducted with three Y-allele primers and one autosomal primer used as a gDNA quality control. Phenotypic sex was determined by gonadal histology and males and females are shown using red and yellow color respectively. Female-to-male sex-reversed animals (N= 7) are highlighted by red boxes. Hashes indicate animals with unknown phenotypic sex with undifferentiated gonads based on histology.



Figure S4

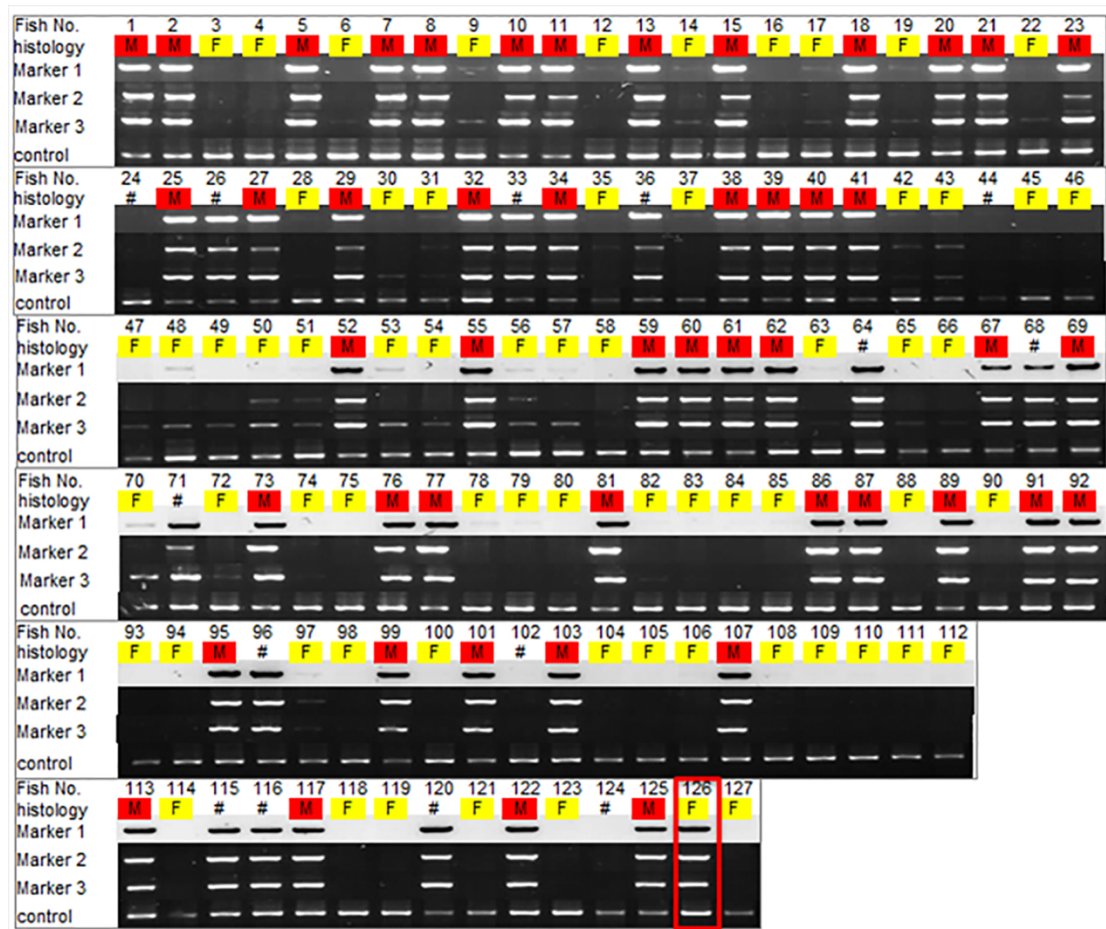

**Figure S4.** Sex genotyping with Y-allele primers of the offspring of a putative XY male with a normal XX female. Genotyping was conducted with three Y-allele primers and one autosomal primer used as a gDNA quality control. Phenotypic sex was determined by gonadal histology and males and females are shown using red and yellow color respectively. The female-to-male sex-reversed animal (N= 1) is highlighted by a red box. Hashes indicate animals with unknown phenotypic sex with undifferentiated gonads based on histology.
